# Supplementary material for: Intermediate ions as indicator for local new particle formation
Source: Copernicus journal article supplement (doi:10.5194/ar-2-93-2024), 2024-05-22
Supplement: Supplementary file 1 [file ar-2-93-2024-supplement.pdf]

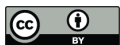

*Supplement of*

## **Intermediate ions as indicator for local new particle formation**

**Santeri Tuovinen et al.**

*Correspondence to:* Markku Kulmala ([markku.kulmala@helsinki.fi](mailto:markku.kulmala@helsinki.fi))

The copyright of individual parts of the supplement might differ from the article licence.

Dec-Feb

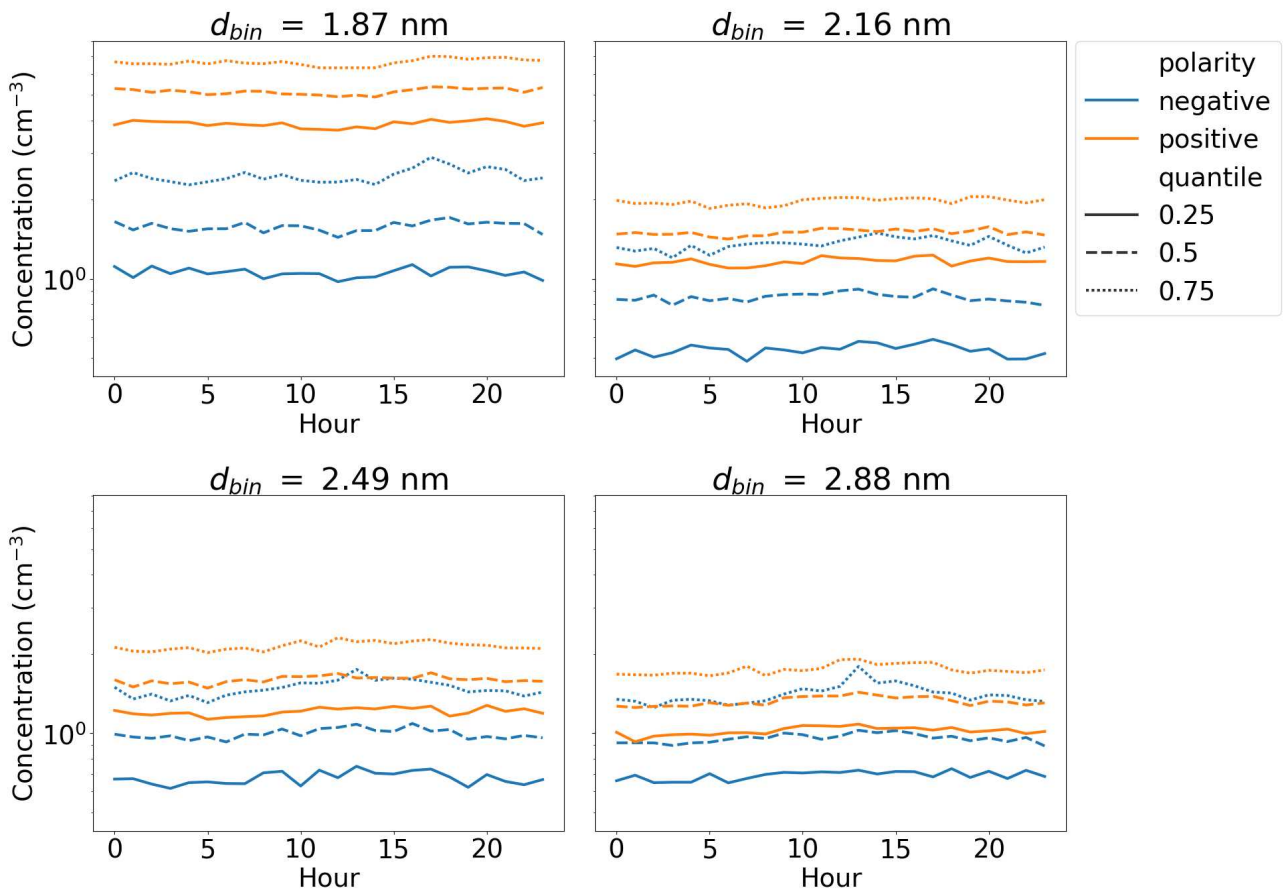

**Fig. S1:** Hourly ion concentrations from December-February in size bins with geometric mean mobility diameter  $d_{bin}$  based on median, 25%, and 75% quantiles. The ion concentrations were measured by a Neutral cluster and Air Ion Spectrometer (NAIS) at the SMEAR II measurement station in Hyytiälä, Finland from 2016 to 2020.

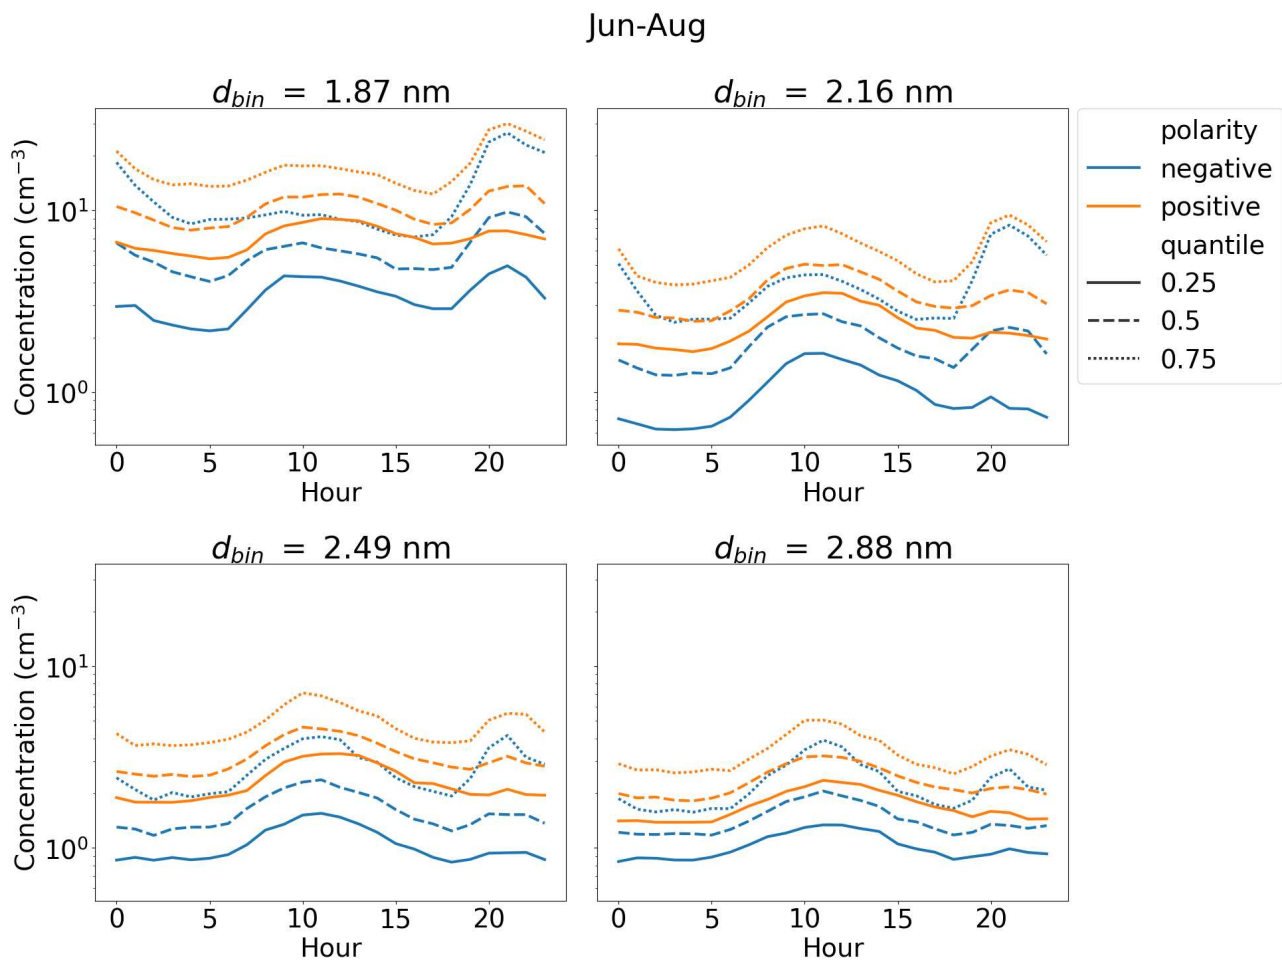

**Fig. S2:** Hourly ion concentrations from June-August in size bins with geometric mean mobility diameter  $d_{bin}$  based on median, 25%, and 75% quantiles. The ion concentrations were measured by a Neutral cluster and Air Ion Spectrometer (NAIS) at the SMEAR II measurement station in Hyytiälä, Finland from 2016 to 2020.

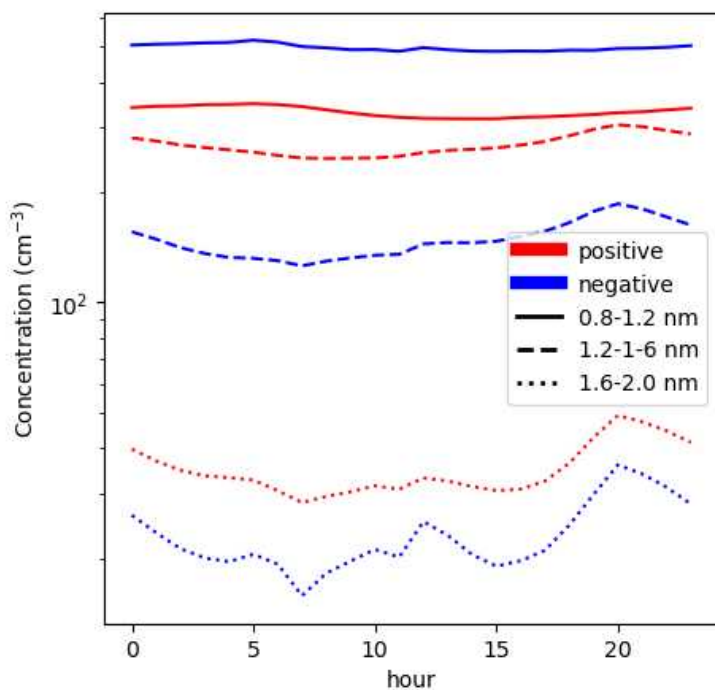

**Fig. S3:** Median hourly concentrations of positive and negative small ions for diameter ranges 0.8-1.2 nm, 1.2-1.6 nm, and 1.6-2 nm. The ion concentrations were measured by a Neutral cluster and Air Ion Spectrometer (NAIS) at the SMEAR II measurement station in Hyytiälä, Finland from 2016 to 2020.
